# Supplementary material
Source: publisher figshare collection journal article supplement (https://tandf.figshare.com/ndownloader/files/11499845)
Supplement: Supplementary file 1 [file 11499845]

**Supplementary Table S1:**

**Questions to facilitate focus group discussion**

***Pre-Stepping On***

1. Can you share some of the ***common falls prevention strategies*** that you have been using in conjunction with community rehabilitation program for your stroke clients in the centre?
   - Are there any different falls prevention strategies between patients without falls and patients coming back for rehabilitation after a fall?
2. How do you ***involve family members and domestic helpers*** (maids) of existing stroke clients in falls prevention?
3. Problems and barriers when implementing falls prevention, e.g. personal factors, organizational factors, cultural factors?
4. Any existing falls prevention program?

***Post-stepping on***

1. If you are developing a new falls prevention program for your stroke clients in your centre, what are some ***key elements of Stepping On program*** that you would like to ***adapt*** to the new Stepping On after Stroke falls prevention program?
2. In view of the main objectives of developing this new stepping on program are to reduce falls and increase community participation, any other ***additional key interventions/elements*** you think are essential to be included in the new program?
3. What do you think of having some ***community outing sessions*** in addition to the weekly group based sessions practiced in Stepping On program?

- Do you think the community outing should be based on their individual rehab goals?
- Should it be an individual community integration session?
- Any thoughts for using mobility hub or Mobility corner in the hospital settings or community settings? Or shall we use our neighbourhood environment?
- What about Home visits or Home assessments in addition to community outing?
- What might be some possible constraints or barriers in doing the above activities?

1. What is your view if we include a ***special educational session*** for family members and domestic helpers as part of the Stepping On after Stroke program?
   - Should this caregiver education session be a separate session or combined session for family members and helpers?
   - What should be included in this educational session?
2. ***Problems and barriers*** if implementing Stepping On after stroke program, e.g. personal factors, organizational factors, cultural factors
3. If we roll out the Stepping On after Stroke program, how it will work? How can we incorporate current community resources, e.g. mobility hub, neighbourhood environment, family members & caregivers, etc.
